# Supplementary material for: Structural conservation of WEE1 and its role in cell cycle regulation in plants
Source: PubMed Central journal article supplement (PMC8668995; doi:10.1038/s41598-021-03268-x), 2021-12-13

|                                       |         |                    |                         |                            |           |       |
|---------------------------------------|---------|--------------------|-------------------------|----------------------------|-----------|-------|
| <i>Citrus sinensis</i>                | AER---  | RKALLEVQALAAALGS-- | HENIVGYSSWFE---         | NEQLYIQMELCD---            | HSLSD--   | KKASQ |
| <i>Eucalyptus grandis</i>             | WER---  | RKALMEVQSLAALGS--  | HENIVGYSSWFE---         | NEHLYIQMELCD---            | YSLSS--   | OKSTR |
| <i>Gossypium hirsutum</i>             | TER---  | RKALMEVQALAAALGS-- | HENIVGYSSWFE---         | NEQLYIQMELCD---            | YSLSR--   | KSSTQ |
| <i>Theobroma cacao</i>                | TER---  | RKALMEVQALAAALGS-- | HENIVGYSSWFE---         | NEQLYIQMELCD---            | YSLSR--   | NTSLQ |
| <i>Hevea brasiliensis</i>             | AEK---  | RKALMEVQALAAALGC-- | HENIVGYSSWFE---         | NEQLYIQMELCD---            | CSLSI--   | NKSSK |
| <i>Selaginella moellendorffii</i>     | GDR---  | RKALREVOALSCLGY--  | HENVVRYFSSWFE---        | NDFLYIQMELCE---            | TNLRDE--  | SLAW  |
| <i>Physcomitrium patens</i>           | VER---  | RQALTEVQALAAVGF--  | HENVVRYTAWFE---         | DEYCYIQTELCE---            | SNLTQLR-- | DADPN |
| <i>Chlamydomonas reinhardtii</i>      | QAR---  | NMWLNEMQALAAVQP--  | HPNIVGLYDTWFE           | PGGDAEQAYIKQELCG---        | ESLRDM--  | FKRRV |
| <i>Schizosaccharomyces pombe</i>      | PK---   | ERNRLQEVSV--       | IQRALKGHDHIVELMDSWEH--- | GGFLYMQVELCENGSLDRFLEEQ--  | GQLS      |       |
| <i>Saccharomyces cerevisiae S288C</i> | LKRILLE | KILNEVTNQITMDQ     | EGKEYIIDYISSWKF---      | QNSYYIMTELCENGLDGFLOEQVI   | AKKK      |       |
| <i>Drosophila melanogaster</i>        | SFE---  | KRALNEVWAHAVLGR--  | HDNVVRYSAWAE---         | DDHMLIQNEFCDDGGSLHARIQD--- | H         |       |
| <i>Danio rerio</i>                    | VDE---  | QNALREVVYAHAVLGR-- | HPHVRYSAWAE---          | DDHMLIQNEYCNGGTLSDVIAEN--  | RRRMH     |       |
| <i>Mus musculus</i>                   | VDE---  | QNALREVVYAHAVLGR-- | HPHVRYSAWAE---          | DDHMLIQNEYCNGGSLADAISEN--  | YRVMS     |       |
| <i>Homo sapiens</i>                   | VDE---  | QNALREVVYAHAVLGR-- | HSHVVRYSAWAE---         | DDHMLIQNEYCNGGSLADAISEN--  | YRIMS     |       |

ATP-Bs

|                                       |                        |            |        |                                       |               |         |     |
|---------------------------------------|------------------------|------------|--------|---------------------------------------|---------------|---------|-----|
|                                       | 220                    | 230        | 240    | 250                                   | 260           | 270     | 280 |
| <i>Medicago truncatula</i>            | LLAEGQVLEVLVYQVANALRFI | HDKGI      | IAHLDL | KPDNIYVKN                             | -----         | G       |     |
| <i>Trifolium pratense</i>             | FLAEGQVLKAFYQVANALRFM  | HEKGI      | IAHLDV | KPDNIYVKN                             | -----         | G       |     |
| <i>Pisum sativum</i>                  | LLSEGQLLEVLVYQVANALRFI | HEKGI      | IVHLDV | KPDNIYVKN                             | -----         | G       |     |
| <i>Vicia faba</i>                     | LLSEGQLLEVLVYQIANALRFI | HEKGI      | IVHLDV | KPDNIYVKN                             | -----         | G       |     |
| <i>Cicer arietinum</i>                | LLAEGQALEVLVYQVANALQFI | HEKGI      | VAHLDV | KPDNIYVKN                             | -----         | S       |     |
| <i>Lotus japonicus</i>                | LLTEGQVLDALYQVANALRFI  | HEKGI      | IAHLDV | KPDNIYIKN                             | -----         | G       |     |
| <i>Lupinus angustifolius</i>          | LFTEGQALEALYQVANALRFI  | HEKGI      | IAHLDV | KPDNIYVKN                             | -----         | G       |     |
| <i>Glycine max (Chr3)</i>             | LFTEGQVLDALFQVANALQFI  | HEKGI      | IAHLDV | KPDNIYVKN                             | -----         | G       |     |
| <i>Glycine max (Chr13)</i>            | LVTAGHEIEALYQVASALQFI  | HKKG       | IAHLDV | KPENIYVKN                             | -----         | G       |     |
| <i>Phaseolus vulgaris</i>             | AFSEAQVLDALFQVANALRFI  | HAKGI      | MAHLDV | KPDNIYVKN                             | -----         | G       |     |
| <i>Vigna unguiculata (Chr1)</i>       | AFTEAQVLDALFQIANALRFI  | HEKGI      | MAHLDV | KPNNIYVKS                             | -----         | G       |     |
| <i>Vigna unguiculata (Chr6.1)</i>     | LLTERHEIQVLYQVSSALQFI  | HEKGI      | IAHLHV | KPQNIYVKD                             | -----         | G       |     |
| <i>Vigna unguiculata (Chr6.2)</i>     | SLSQRYEIEVLVYQISSALQFI | HGKG       | IAHLDV | KPENIYVKS                             | -----         | G       |     |
| <i>Arachis hypogaea (Chr16)</i>       | SLTEGQVLEALYQIANALRFI  | HEKGI      | IAHLDV | KPDNIYVKN                             | -----         | G       |     |
| <i>Arachis hypogaea (Chr6)</i>        | SFTEGQVLEALYQIANALRFI  | HEKGI      | IAHLDV | KPDNIYVKN                             | -----         | G       |     |
| <i>Cajanus cajan</i>                  | LFTEGQVLDALFQVAKALRFI  | HEKGI      | IAHLDV | KPDNIYVKN                             | -----         | G       |     |
| <i>Prosopis alba</i>                  | MFTEGQVLEALHQVAKALLFI  | HERG       | IAHLDV | KPDNIYVKN                             | -----         | G       |     |
| <i>Arabidopsis thaliana</i>           | KVSEREILVIMHQIAKALHFV  | HEKGI      | IAHLDV | KPDNIYIKN                             | -----         | G       |     |
| <i>Brassica napus</i>                 | RISEREILVIMHQIAKALQV   | HEKGI      | IAHLDV | KPDNIYIKN                             | -----         | G       |     |
| <i>Nicotiana tabacum (1)</i>          | LSSEVAVLEAMYQVAKALQYI  | HQRG       | VAHLDV | KPDNIYVKS                             | -----         | G       |     |
| <i>Nicotiana tabacum (2)</i>          | LFSEVEVLEAMYQVAKALQYI  | HQRG       | VAHLDV | KPDNIYVKS                             | -----         | G       |     |
| <i>Nicotiana tomentosiformis</i>      | LSSEVAVLEAMYQVAKALQYI  | HQRG       | VAHLDV | KPDNIYVKS                             | -----         | G       |     |
| <i>Nicotiana sylvestris</i>           | LFSEVEVLEAMYQVAKALQYI  | HQRG       | VAHLDV | KPDNIYVKS                             | -----         | G       |     |
| <i>Solanum lycopersicum</i>           | LFSEVEVLEAMYQVANALQFI  | HQRG       | VAHLDV | KPDNIYVKN                             | -----         | G       |     |
| <i>Brachypodium distachyon</i>        | LLKHEEALELLYQVSKGLDFI  | HGRG       | IAHLDV | KPDNIYVKN                             | -----         | G       |     |
| <i>Triticum dicoccoides</i>           | PLEFGDALELLYQICKGLDFI  | HGRG       | VAHLDV | KPDNIYVRN                             | -----         | G       |     |
| <i>Oryza sativa</i>                   | PLKCGEALELLYQICKGLDFI  | HERG       | IAHLDV | KPDNIYVRN                             | -----         | G       |     |
| <i>Zea mays</i>                       | PVKRGEALELLYQICKGLDFM  | HERG       | IAHLDV | KPDNIYVRN                             | -----         | G       |     |
| <i>Sorghum bicolor</i>                | PVKHGEAMELLYQICKGLDFM  | HERG       | IAHLDV | KPDNIYVRN                             | -----         | G       |     |
| <i>Daucus carota</i>                  | LYTEGEVLEAMHQIAKALRYI  | HERG       | VAHLDV | KPENIYVKN                             | -----         | G       |     |
| <i>Helianthus annuus</i>              | ICSEGEVLEAMHQIAKALQFI  | HEKGI      | IVHLDV | KPENIYVKN                             | -----         | G       |     |
| <i>Cynara cardunculus</i>             | LCLEGEVLEAMHQIAKALQFI  | HEKGI      | IVHLDV | KPENIYVKN                             | -----         | G       |     |
| <i>Populus trichocarpa</i>            | SITEGEALQVLLQIAKALKFI  | HERG       | IAHLDV | KPDNIYFKN                             | -----         | G       |     |
| <i>Malus domestica</i>                | PFKEGEILEALYQISKALQLI  | HGRG       | IAHLDV | KPDNIYVKN                             | -----         | G       |     |
| <i>Prunus persica</i>                 | TFTEGEILEVLVFIQAKALQFI | HKKG       | IAHLDV | KPDNIYVKN                             | -----         | G       |     |
| <i>Quercus suber</i>                  | LFTEAEVLQALHQIAKALQFI  | HGRG       | IAHLDV | KPDNIYVKN                             | -----         | G       |     |
| <i>Juglans regia</i>                  | LLAEQEVLLALYQVAKALQFI  | HERG       | IAHLDV | KPDNIYVKN                             | -----         | G       |     |
| <i>Vitis vinifera</i>                 | LFTEGEVLEAMHQIAKALQF   | THEKG      | IAHLDV | KPDNIYVKD                             | -----         | G       |     |
| <i>Citrus sinensis</i>                | FFAEGEVLKALHQIAQALQFI  | HEKGI      | IAHLDV | KPDNIYVKN                             | -----         | G       |     |
| <i>Eucalyptus grandis</i>             | -LTEWDALTALYQLAKALLFM  | HERG       | IAHLDV | KPDNIYVKN                             | -----         | G       |     |
| <i>Gossypium hirsutum</i>             | LFTEGEFLRAMHQAKALQFI   | HEKGI      | IVHLDV | KPDNIYVKN                             | -----         | G       |     |
| <i>Theobroma cacao</i>                | LFTEAEVLRALLQIAKALQFI  | HERG       | IAHLDV | KPDNIYVKN                             | -----         | G       |     |
| <i>Hevea brasiliensis</i>             | SITEDIKVLVHLHQIAKALHFI | HGCG       | IAHLDV | KPDNIYVKN                             | -----         | G       |     |
| <i>Selaginella moellendorffii</i>     | TFTEKKLTEAMFQLLNALKHL  | SHHG       | LAHLDV | KPDNIYIRK                             | -----         | G       |     |
| <i>Physcomitrium patens</i>           | VSKESSLLEIMRQMASALS    | SAIHSKG    | LVHLDV | KPDNIYVLN                             | -----         | G       |     |
| <i>Chlamydomonas reinhardtii</i>      | QFKEVEVLEIILRQMASALKRI | HDLG       | MVHLDI | KPDNIYLAAPSPADLALRAASGANASSAGSSSGSS-- |               |         |     |
| <i>Schizosaccharomyces pombe</i>      | RLDEFVRWKILVEVALGLQFI  | HHKN       | VVHLDL | KPANVMITFEG                           |               |         |     |
| <i>Saccharomyces cerevisiae S288C</i> | RLEDWRIWKIIVELSALRFI   | HDSCH      | IVHLDL | KPANVMITFEG                           |               |         |     |
| <i>Drosophila melanogaster</i>        | CLGEAELKIVLMHVI        | EGRLYIHSND | LVHMDL | KPENIFSTMPNAHKLVEVQPQQT--             | KDDDGMDSVYEEL |         |     |
| <i>Danio rerio</i>                    | FLSELELDKDLLLQVSRGLYI  | HSTA       | LVHMDI | KPSNIFISRK--                          | PAASVEEFE     | DEEDGPT |     |
| <i>Mus musculus</i>                   | YLTEVELKDLLLQVGRGLRYI  | HSMS       | LVHMDI | KPSNIFISRTSIPNAVSEEG--                |               | DEDDWIS |     |
| <i>Homo sapiens</i>                   | YFKEAELKDLLLQVGRGLRYI  | HSMS       | LVHMDI | KPSNIFISRTSIPNAASEEG--                |               | DEDD AS |     |

Catalytic segment

|                            |       |                    |      |             |        |       |                         |
|----------------------------|-------|--------------------|------|-------------|--------|-------|-------------------------|
|                            | 290   | 300                | 310  | 320         | 330    | 340   | 350                     |
| <i>Medicago truncatula</i> | ----- | VYKLGDFGCATLTDSS-- | LP-- | IEEGDARYMPQ | EILNEN | ----- | YDHLDKVDIFSLGVSITVQLVRK |



|                                       |                                                                          |
|---------------------------------------|--------------------------------------------------------------------------|
| <i>Nicotiana tomentosiformis</i>      | --SPLPESGPHFLNLRREGKLP LLP-GHS LQ-----FQNL LKVMMD PDPTRRP                |
| <i>Nicotiana glauca</i>               | --SPLPESGPHFLNLRREGKLP LLP-GHS LQ-----FQNL LKVMMD PDPTRRP                |
| <i>Solanum lycopersicum</i>           | --SSLPESGPHFLNLRREGKLP LLP-GHS LQ-----FQNL LKAMMD PDPTRRP                |
| <i>Brachypodium distachyon</i>        | --TPLPLSGPQFTSLREGKLFALLP-GRPIQ-----FQNL IKLMMD PDPTRRP                  |
| <i>Triticum dicoccoides</i>           | --TPLPVSGHQFASLREGKISLLP-GHPMQ-----FQSL IKSMMD PDPVRRP                   |
| <i>Oryza sativa</i>                   | --TQLPDSGPQFTSLREGKIALLP-GCPMQ-----FQSL IKSMMD PDPVRRP                   |
| <i>Zea mays</i>                       | --TPLPESGSHFTSIREGKIALLP-GCPMQ-----FQSL IKSMMD PDPVRRP                   |
| <i>Sorghum bicolor</i>                | --TPLPESGPHFTSIREGKIALLP-GCPMQ-----FQSL IKSMMD PNPVRRP                   |
| <i>Daucus carota</i>                  | --STLPESGPHFLHLREGKLP LLP-GHSVQ-----FQSL LKAMMD PDPMRRP                  |
| <i>Helianthus annuus</i>              | --STLPDSGPYFQNLREGKLP LLP-GHSVQ-----FQNL IKAMLD PDPVRRP                  |
| <i>Cynara cardunculus</i>             | --STLPESGPYFQNLREGKLP LLP-GHSVQ-----FQNL VKAMLD PDPVRRP                  |
| <i>Populus trichocarpa</i>            | --STLPQSGSHLFLNLRREGKLP LLP-GHS LQ-----LQNL LKAMVC PDPVRRP               |
| <i>Malus domestica</i>                | --SPLPESGPQILNLRREGKLP LLP-GHS LQ-----FQNL LKFM LD PNPVWRP               |
| <i>Prunus persica</i>                 | --LPLPESGPQILNLRREGKLP LLP-GHS LQ-----FQNL LKVM LD PNPVWRP               |
| <i>Quercus suber</i>                  | --SPLPEAGSQFT--KEGKLALLP-GHS LQ-----FQNL LKVMVD PDPVRRP                  |
| <i>Juglans regia</i>                  | --SPLPESRSQFNLNLRREGKLP LLP-GHS LQ-----FQNL LKAMVD PDPVRRP               |
| <i>Vitis vinifera</i>                 | --SHLPESGYQFNLNLRREGKLP LLP-GYS LQ-----FQNL LKAMLD PDPVQRP               |
| <i>Citrus sinensis</i>                | --SPLSESGPQFNLNLRREGKLP LLP-GHS LQ-----FQNL LKVMVD PDPVQRP               |
| <i>Eucalyptus grandis</i>             | --SPLPESGPQFNLNLRREGKLP LLP-GHSLH-----FQNL LKVMMD PDPVTRRP               |
| <i>Gossypium hirsutum</i>             | --SPLPESGPQFNLNLRREGKLP LLP-GYS LQ-----FQNL LKAMVD PDPVRRP               |
| <i>Theobroma cacao</i>                | --SPLQESGRQFT--REGKLP LLP-GHS LQ-----FQNL LKVMVD PDPVRRP                 |
| <i>Hevea brasiliensis</i>             | --SPLPKSGSQFNLNLRREGKLP LLP-GHSLH-----FQNL LKVM LD PDPVQRP               |
| <i>Selaginella moellendorffii</i>     | --SPLPASGSQYQAIRQKLP LLP-GFSLV-----FQSL IKSLMHPAAKNRP                    |
| <i>Physcomitrium patens</i>           | --LPLPTSQAQFNLNLRREGKLP LLP-GYS LQ-----LQNL LKALLNPDASARP                |
| <i>Chlamydomonas reinhardtii</i>      | --TELPKNGQSYHDIRQKLP-FLP-SASTR-----IINLLKMMSPDPAQRP                      |
| <i>Schizosaccharomyces pombe</i>      | --IVLPDNGSQWQKLRSGDLSADAPRLSSTD-NGSSLTSSSRET PANSIIGQGGLDRVVEWMLSPEPRNRP |
| <i>Saccharomyces cerevisiae S288C</i> | --VVLPDNGNAWHKLRSGDLSADAPRLSSTD-IHSESLFSDITKVD TNDLDFDE-FDNISGNSNAGTSTVH |
| <i>Drosophila melanogaster</i>        | --GPLPKNGPEWHNLRDQKVPILP-SLSRD-----FNELIAQMMHPYDKRP                      |
| <i>Danio rerio</i>                    | --EPLPTNGDKWHKIRQGILPHIPQVLSQE-----FLSLLKLMIHDPTRRP                      |
| <i>Mus musculus</i>                   | --EPLPRNGEQWHEIRQGRLPRIQVLSQE-----VTELLRVMIHDPERRP                       |
| <i>Homo sapiens</i>                   | --EPLPRNGDQWHEIRQGRLPRIQVLSQE-----FTELLKVMIHDPERRP                       |

430

....|....|.

|                                   |              |
|-----------------------------------|--------------|
| <i>Medicago truncatula</i>        | SARELVENPIF  |
| <i>Trifolium pratense</i>         | SARELVENPIF  |
| <i>Pisum sativum</i>              | SARELVENPIF  |
| <i>Vicia faba</i>                 | SARELVENPIF  |
| <i>Cicer arietinum</i>            | SARELVENPIF  |
| <i>Lotus japonicus</i>            | SARELVENPIF  |
| <i>Lupinus angustifolius</i>      | SARELVENPIF  |
| <i>Glycine max (Chr3)</i>         | SAKELIENPIF  |
| <i>Glycine max (Chr13)</i>        | SATKLLKRVL-  |
| <i>Phaseolus vulgaris</i>         | SAKELVENPIF  |
| <i>Vigna unguiculata (Chr1)</i>   | SARELVENPIF  |
| <i>Vigna unguiculata (Chr6.1)</i> | SATEILGNSIF  |
| <i>Vigna unguiculata (Chr6.2)</i> | SATEILGNSIF  |
| <i>Arachis hypogaea (Chr16)</i>   | SARELIENPIF  |
| <i>Arachis hypogaea (Chr6)</i>    | SARELIENPIF  |
| <i>Cajanus cajan</i>              | SAKELVENPIF  |
| <i>Prosopis alba</i>              | SARELVENPIF  |
| <i>Arabidopsis thaliana</i>       | SARELLDHMPF  |
| <i>Brassica napus</i>             | SARELVEHMPF  |
| <i>Nicotiana tabacum (1)</i>      | SAKDLDVNPFI  |
| <i>Nicotiana tabacum (2)</i>      | YAKDLVDNPIF  |
| <i>Nicotiana tomentosiformis</i>  | SAKDLDVNPFI  |
| <i>Nicotiana glauca</i>           | YAKDLVDNPIF  |
| <i>Solanum lycopersicum</i>       | SAKGVVDNPIF  |
| <i>Brachypodium distachyon</i>    | SAKEILRHPIF  |
| <i>Triticum dicoccoides</i>       | SAKEILRHPIF  |
| <i>Oryza sativa</i>               | SAKEVLRHPIF  |
| <i>Zea mays</i>                   | SAKEILRHPSF  |
| <i>Sorghum bicolor</i>            | SAKEILRHPSF  |
| <i>Daucus carota</i>              | SAKEVVENQLF  |
| <i>Helianthus annuus</i>          | SAKELVVNPIF  |
| <i>Cynara cardunculus</i>         | SAKELVVNPIF  |
| <i>Populus trichocarpa</i>        | SAKELIENPMF  |
| <i>Malus domestica</i>            | SAKDLDVENPIF |
| <i>Prunus persica</i>             | SAKDLDVENPIF |
| <i>Quercus suber</i>              | SAKELLENPIF  |
| <i>Juglans regia</i>              | SAKELVQNTIF  |
| <i>Vitis vinifera</i>             | SAKELVENPIF  |
| <i>Citrus sinensis</i>            | SAKELVENPIF  |
| <i>Eucalyptus grandis</i>         | SAKELVANPIF  |
| <i>Gossypium hirsutum</i>         | SAKELVENPIF  |
| <i>Theobroma cacao</i>            | SAKELIENPIF  |
| <i>Hevea brasiliensis</i>         | SAKELLENPIF  |

|                                       |              |
|---------------------------------------|--------------|
| <i>Selaginella moellendorffii</i>     | SAAQALKNALF  |
| <i>Physcomitrium patens</i>           | SAAE LLNHSVF |
| <i>Chlamydomonas reinhardtii</i>      | TADGILRSTLL  |
| <i>Schizosaccharomyces pombe</i>      | TIDQILATDEV  |
| <i>Saccharomyces cerevisiae S288C</i> | NNSNINNPNN   |
| <i>Drosophila melanogaster</i>        | TSQSIFSHPII  |
| <i>Danio rerio</i>                    | STSELVRHPVL  |
| <i>Mus musculus</i>                   | SAMELVKHSVL  |
| <i>Homo sapiens</i>                   | SAMALVKHSVL  |

Supplementary Figure 2

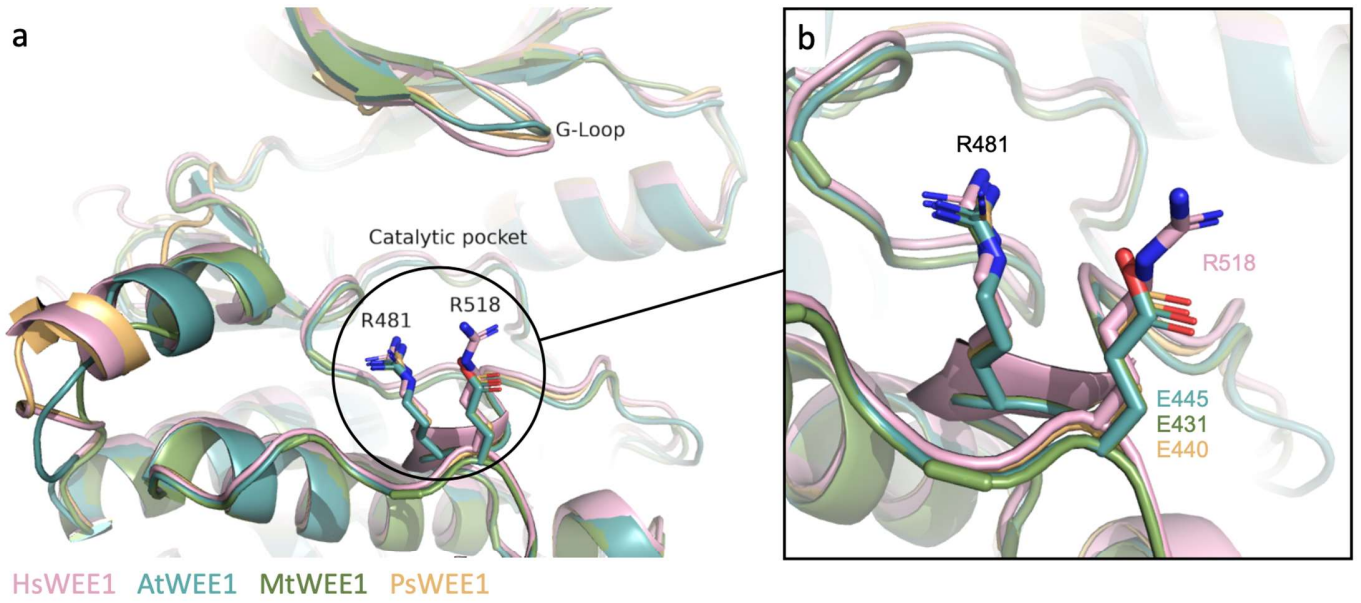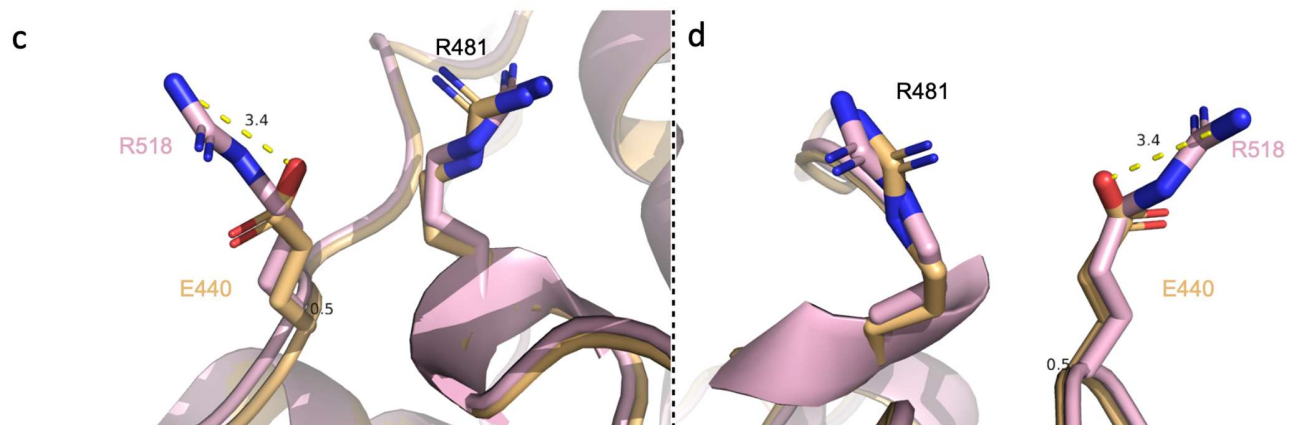

### Supplementary Figure 3

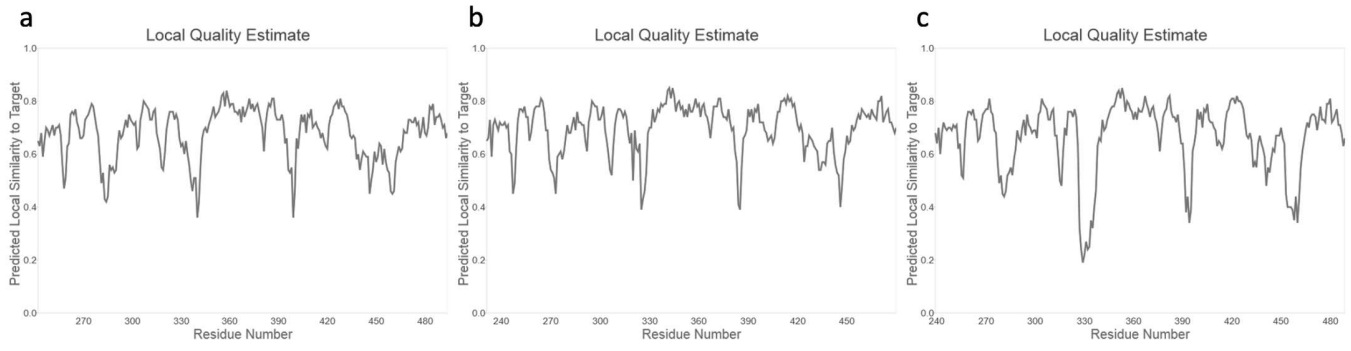

Supplement: 41598_2021_3268_MOESM2_ESM.pdf [file 41598_2021_3268_MOESM2_ESM.pdf]
